# Supplementary material
Source: publisher site journal article supplement (https://www.dovepress.com/article/382285)
Supplement: Supplementary file 1 [file get_supplementary_file.php]

Supplementary file

Supplementary Table 1

(8) Body Mass Index, Airflow Obstruction, Dyspnea, and Exercise Capacity Index(BODE) index

| Index                    | BODE index score (point) |         |         |      |
|--------------------------|--------------------------|---------|---------|------|
|                          | 0                        | 1       | 2       | 3    |
| FEV1%                    | > 65                     | 50 -64  | 36-49   | <35  |
| 6MWD (m)                 | > 350                    | 250-349 | 150-249 | <149 |
| mMRC                     | 0 - 1                    | 2       | 3       | 4    |
| BMI (kg/m <sup>2</sup> ) | > 21                     | < 21    |         |      |

Note: From New England Journal of Medicine, Bartolome R Celli, Claudia G Cote, Jose M. Marin et al., The body-mass index, airflow obstruction, dyspnea, and exercise capacity index in chronic obstructive pulmonary disease, 350(10):1005-1012. Copyright© 2004, Massachusetts Medical Society. Reprinted with permission from Massachusetts Medical Society.
